# Supplementary material for: Ultraviolet/visible photodetectors with ultrafast, high photosensitivity based on 1D ZnS/CdS heterostructures
Source: Royal Society of Chemistry journal article supplement (doi:10.1039/c5nr08792a), 2016-01-01
Supplement: c5nr08792a1.pdf [file c5nr08792a1.pdf]

## Ultraviolet/visible photodetectors with ultrafast, high photosensitivity based on 1D ZnS/CdS heterostructures

Zheng Lou, Ludong Li, Guozhen Shen\*

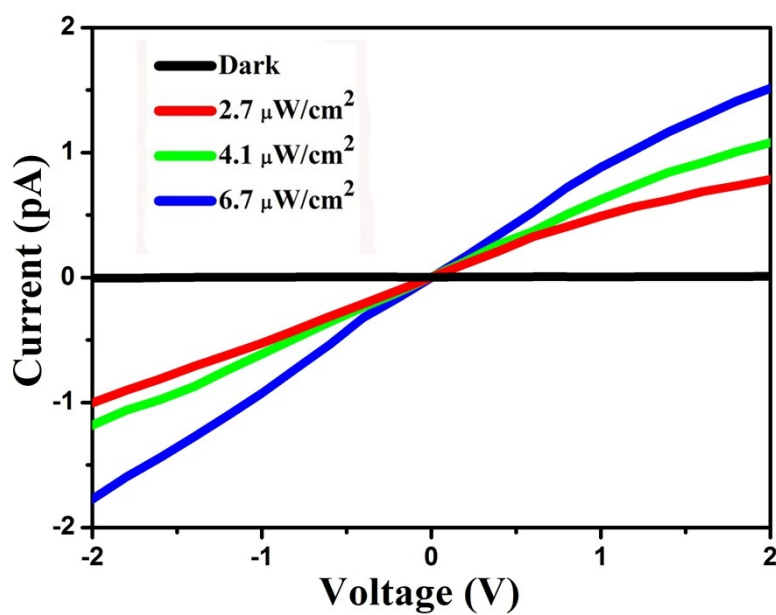

**Fig. S1** I-V test result of the ZnS nanobelt based photodetector under 300 nm UV light with various power intensities and in dark.

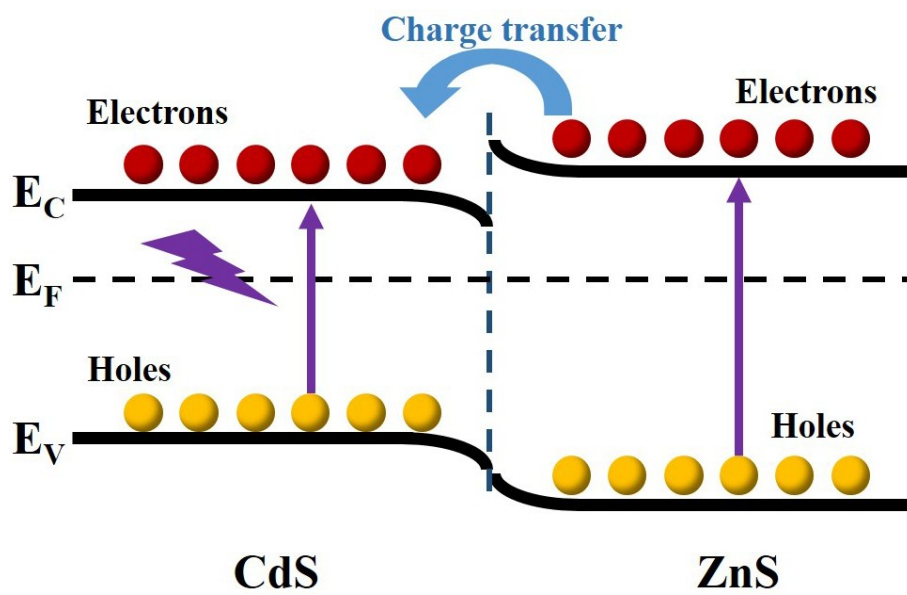

**Fig. S2** Schematic energy band diagram for ZnS/CdS heterostructures under light illumination.

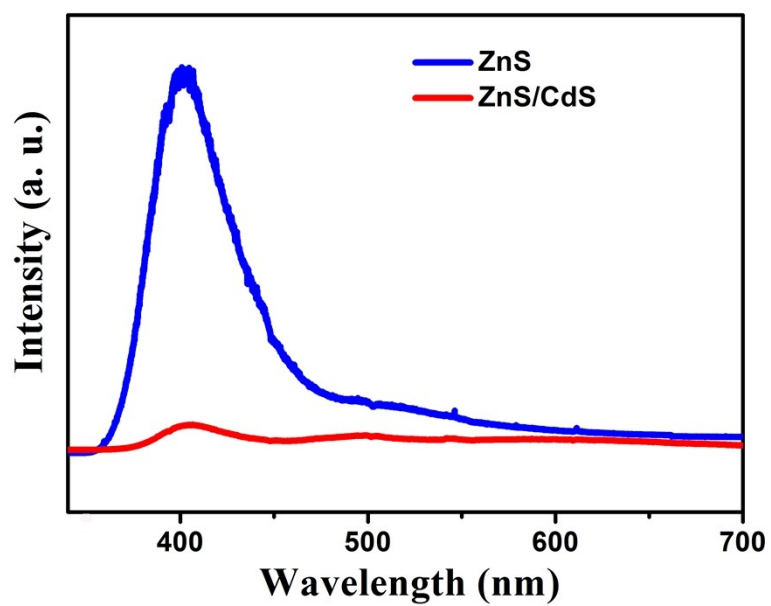

**Fig. S3** Photoluminescence spectra of ZnS nanobelts, and ZnS/CdS 1D heterostructure.

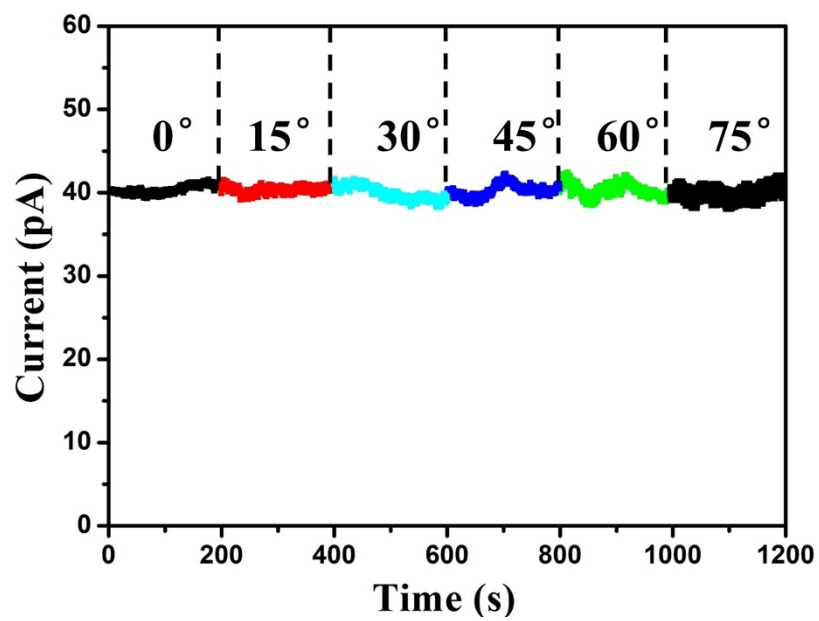

**Fig. S4** I-T curves of the flexible device corresponding to various bending cycles under 300 nm UV light.
